# Supplementary material
Source: HighWire-hosted journal article supplement (https://heart.bmj.com/content/104/16/1333)
Supplement: inline-supplementary-material-1 [file inline-supplementary-material-1.pdf]

**Online supplement - Table 1**

Children's cardiac diagnoses and previous surgical procedures, with classification at the time of the test, stating whether there was right to left shunt (actual or potential, including patients unrepaired/palliated), and their Hypoxic Challenge Test results.

| <b>Gender</b> | <b>Age (yrs)</b> | <b>Diagnosis</b>                                                                                               | <b>Previous procedures</b>                                                                                                                                                                                         | <b>Classification</b>                             | <b>Baseline SpO<sub>2</sub></b> | <b>Test lowest SpO<sub>2</sub></b> |
|---------------|------------------|----------------------------------------------------------------------------------------------------------------|--------------------------------------------------------------------------------------------------------------------------------------------------------------------------------------------------------------------|---------------------------------------------------|---------------------------------|------------------------------------|
| M             | 0.5              | Coarctation of aorta; 1.1cm secundum ASD                                                                       | Coarctation repair                                                                                                                                                                                                 | Acyanotic with repair and potential for R-L shunt | 96%                             | 84%<br><i>FAIL</i>                 |
| M             | 1.8              | Critical aortic stenosis; mitral stenosis                                                                      | Aortic valve repair; mitral valve repair                                                                                                                                                                           | Acyanotic with repair and no R-L shunt            | 100%                            | 93%                                |
| M             | 3.3              | Coarctation of aorta; bicuspid aortic valve; mitral stenosis                                                   | Coarctation repair; balloon dilatation of re-coarctation                                                                                                                                                           | Acyanotic with repair and no R-L shunt            | 100%                            | 94%                                |
| F             | 0.8              | Complete AVSD with large atrial & moderate ventricular component; moderate left AV regurgitation               | Complete AVSD repair                                                                                                                                                                                               | Acyanotic with repair and no R-L shunt            | 100%                            | 95%                                |
| M             | 2.1              | Valvar & supra-valvar pulmonary stenosis; asymmetric septal LV hypertrophy; possible Noonan syndrome           | Balloon dilation of pulmonary valve; surgical relief of pulmonary outflow stenosis (pulmonary valvotomy, infundibular myomectomy, patch enlargement of supra-valvar stenosis), enlargement of left PA, ASD closure | Acyanotic with repair and no R-L shunt            | 99%                             | 94%                                |
| M             | 11.5             | Anomalous origin of left coronary artery from anterior sinus with compression between aorta & pulmonary artery | Left internal mammary artery graft to left anterior descending coronary artery; enlargement of left coronary artery orifice; stenting of left coronary ostial stenosis                                             | Acyanotic with repair and no R-L shunt            | 99%                             | 91%                                |
| F             | 1.6              | AVSD with large primum & ventricular components; Down syndrome                                                 | Complete AVSD repair                                                                                                                                                                                               | Acyanotic with repair and no R-L shunt            | 99%                             | 89%                                |
| F             | 3.5              | Pulmonary valvar & supra-valvar stenosis; mild right PA stenosis                                               | Balloon dilation of pulmonary valve; surgical relief of RV outflow obstruction & patch enlargement of pulmonary trunk                                                                                              | Acyanotic with repair and no R-L shunt            | 99%                             | 95%                                |

|   |      |                                                                                                                                                                                    |                                                                                                                                 |                                                   |      |     |
|---|------|------------------------------------------------------------------------------------------------------------------------------------------------------------------------------------|---------------------------------------------------------------------------------------------------------------------------------|---------------------------------------------------|------|-----|
| M | 5.5  | Left atrial isomerism; biventricular AV connection; VA concordance; SVC & right azygous to right-sided LA; hepatic veins drain right sided LA; AVSD; small PDA; pulmonary stenosis | AVSD repair (re-op same day for patch dehiscence)                                                                               | Acyanotic with repair and no R-L shunt            | 99%  | 92% |
| M | 0.9  | AVSD with separate valve orifices & isolated ventricular component (VSD); Down syndrome; prematurity with IUGR                                                                     | Closure of VSD & closure of cleft of left AV valve. Operation note: no ASD at surgery                                           | Acyanotic with repair and no R-L shunt            | 98%  | 88% |
| M | 14.5 | Sinus venosus defect                                                                                                                                                               | Repair sinus venosus defect                                                                                                     | Acyanotic with repair and no R-L shunt            | 98%  | 95% |
| F | 8.4  | Coarctation of aorta; congenital mitral valve stenosis; bicuspid aortic valve with mild stenosis                                                                                   | Coarctation repair; mitral valve repair                                                                                         | Acyanotic with repair and no R-L shunt            | 98%  | 91% |
| M | 6.3  | Coarctation of aorta; partial AVSD; severe origin stenosis of right PA; Noonan syndrome. Tracheobronchomalacia with vocal palsy                                                    | Coarctation repair; balloon dilatation of right PA; closure of atrial communication & augmentation of right PA                  | Acyanotic with repair and no R-L shunt            | 97%  | 89% |
| F | 2.8  | Secundum ASD & PDA; tracheomalacia                                                                                                                                                 | Attempted device closure of ASD with device embolisation & urgent surgical retrieval of device with direct closure of ASD & PDA | Acyanotic with repair and no R-L shunt            | 97%  | 88% |
| F | 0.5  | Truncus arteriosus type I; ASD; moderate truncal valve regurgitation                                                                                                               | Bilateral PA banding complete repair                                                                                            | Acyanotic with repair and potential for R-L shunt | 98%  | 89% |
| M | 1.5  | Right coronary artery fistula to RV                                                                                                                                                | None                                                                                                                            | Acyanotic without repair and no R-L shunt         | 100% | 94% |
| M | 1.6  | Congenital aortic valve stenosis; moderate stenosis at present                                                                                                                     | None                                                                                                                            | Acyanotic without repair and potential R-L shunt  | 99%  | 92% |
| M | 1.6  | Tetralogy of Fallot                                                                                                                                                                | Tetralogy of Fallot repair - transannular patch with monocusp, closure of VSD, direct closure of PFO                            | Cyanotic with full repair and no R-L shunt        | 100% | 94% |
| M | 0.2  | Transposition of great arteries                                                                                                                                                    | Balloon artery septostomy; arterial switch operation; ASD closure                                                               | Cyanotic with full repair and no R-L shunt        | 100% | 92% |

|   |      |                                                                                                                                                                                        |                                                                                                                                                                                                                                                   |                                                       |      |                    |
|---|------|----------------------------------------------------------------------------------------------------------------------------------------------------------------------------------------|---------------------------------------------------------------------------------------------------------------------------------------------------------------------------------------------------------------------------------------------------|-------------------------------------------------------|------|--------------------|
| F | 0.8  | Total anomalous pulmonary venous connection to RA with restrictive PFO                                                                                                                 | Repair & reconstruction of atrial septum                                                                                                                                                                                                          | Cyanotic with full repair and no R-L shunt            | 100% | 94%                |
| M | 0.9  | Critical pulmonary stenosis; currently mild (gradient 34mmHg)                                                                                                                          | Balloon dilation of pulmonary valve                                                                                                                                                                                                               | Cyanotic with full repair and no R-L shunt            | 99%  | 94%                |
| F | 1.6  | Transposition of great arteries with intact ventricular septum; moderate-severe proximal PA stenoses                                                                                   | Arterial switch operation; balloon PA angioplasty x2                                                                                                                                                                                              | Cyanotic with full repair and no R-L shunt            | 99%  | 93%                |
| M | 0.3  | Transposition of great arteries                                                                                                                                                        | Arterial switch operation & ASD closure                                                                                                                                                                                                           | Cyanotic with full repair and no R-L shunt            | 99%  | 89%                |
| M | 3.7  | Tetralogy of Fallot with pulmonary atresia, accessory left anterior descending from right coronary                                                                                     | Left MBT shunt with left PA reconstruction; balloon angioplasty of left PA; complete repair of Tetralogy of Fallot; reconstruction of pulmonary bifurcation                                                                                       | Cyanotic with full repair and no R-L shunt            | 99%  | 92%                |
| F | 2.6  | Transposition of great arteries with muscular outlet VSD; left PA stenosis                                                                                                             | Arterial switch with VSD closure & PDA ligation; resection of supra-valvar aortic stenosis with left PA augmentation                                                                                                                              | Cyanotic with full repair and no R-L shunt            | 99%  | 93%                |
| F | 1.7  | Transposition of great arteries; large ASD & aortopulmonary window                                                                                                                     | Arterial switch; closure of ASD & aortopulmonary window                                                                                                                                                                                           | Cyanotic with full repair and no R-L shunt            | 99%  | 94%                |
| F | 10.9 | Tetralogy of Fallot with left anterior descending coronary artery anomaly (crossing RV outflow tract); right ventricular enlargement with pulmonary regurgitation & pulmonary stenosis | Tetralogy of Fallot repair with transannular patch & RV-PA conduit                                                                                                                                                                                | Cyanotic with full repair and no R-L shunt            | 98%  | 91%                |
| F | 1.8  | Tetralogy of Fallot & pulmonary atresia; PDA                                                                                                                                           | Right MBT shunt; complete repair leaving PFO & 4mm residual VSD                                                                                                                                                                                   | Cyanotic with full repair and potential for R-L shunt | 99%  | 76%<br><i>FAIL</i> |
| M | 12.1 | Hypoplastic left heart syndrome                                                                                                                                                        | Neonatal right MBT shunt; atrial septectomy; balloon dilatation of coarctation; bidirectional cavopulmonary anastomosis; fenestrated total cavopulmonary connection & augmentation of left PA; transcatheter closure of inter-atrial fenestration | Cyanotic with full repair and potential for R-L shunt | 96%  | 90%                |
| M | 5.5  | Situs inversus; left AV valvar atresia with indeterminate ventricle;                                                                                                                   | MBT shunt; bidirectional cavopulmonary anastomosis with left PA                                                                                                                                                                                   | Cyanotic with full repair and potential for           | 96%  | 83%<br><i>FAIL</i> |

|   |     |                                                                                                                                                   |                                                                                                                                                                                                  |                                                       |     |                    |
|---|-----|---------------------------------------------------------------------------------------------------------------------------------------------------|--------------------------------------------------------------------------------------------------------------------------------------------------------------------------------------------------|-------------------------------------------------------|-----|--------------------|
|   |     | presumed veno-venous collaterals (desaturates on exercise)                                                                                        | augmentation; completion of total cavopulmonary connection with extra-cardiac conduit; no fenestration                                                                                           | R-L shunt                                             |     |                    |
| F | 9.2 | Absent right AV connection; concordant VA connections; PA stenosis                                                                                | Central shunt & atrial septectomy; bidirectional cavopulmonary anastomosis with central shunt in situ; completion of total cavopulmonary connection                                              | Cyanotic with full repair and potential for R-L shunt | 91% | 83%                |
| F | 1.5 | Tetralogy of Fallot with severe pulmonary; branch PA stenoses                                                                                     | RV outflow tract resection with transannular patch & PDA ligation; permanent pacemaker; repair of Tetralogy of Fallot; ASD left open                                                             | Cyanotic with full repair and potential for R-L shunt | 89% | 74%<br><i>FAIL</i> |
| F | 7.5 | Mesocardia; situs solitus; absent right AV connection; single outlet heart with pulmonary atresia; RV connected to aorta; disconnected branch PAs | Neonatal right MBT shunt; left MBT shunt; bidirectional cavopulmonary anastomosis, reconstruction of PA, central shunt & ligation of previous shunts; fenestrated total cavopulmonary connection | Cyanotic with full repair and potential for R-L shunt | 85% | 78%                |
| M | 5.2 | Severe Ebstein malformation of the tricuspid valve; moderate tricuspid regurgitation; ASD                                                         | Ebstein repair with Cone technique; small to moderate residual ASD                                                                                                                               | Cyanotic with full repair and potential for R-L shunt | 80% | 72%                |
| F | 0.5 | Tetralogy of Fallot                                                                                                                               | Left MBT shunt                                                                                                                                                                                   | Cyanotic with palliated CHD                           | 97% | 90%                |
| F | 8.2 | Situs inversus; AV & VA discordance; perimembranous inlet VSD; valvar & supravalvar pulmonary stenosis                                            | Left MBT shunt; right MBT shunt; resection of subpulmonary stenosis; pulmonary valvotomy                                                                                                         | Cyanotic with palliated CHD                           | 97% | 89%                |
| F | 1.7 | Tetralogy of Fallot; non-confluent PAs; right PA arising from pulmonary trunk; left PA from arterial duct                                         | Left MBT shunt & ligation of PDA; balloon angioplasty of left MBT shunt; surgical augmentation of RV outflow tract                                                                               | Cyanotic with palliated CHD                           | 96% | 89%                |
| M | 1.9 | Valvar pulmonary atresia with intact ventricular septum; dysplastic tricuspid valve with stenosis                                                 | Radiofrequency perforation & balloon dilation of pulmonary valve; right MBT shunt; revision of MBT shunt                                                                                         | Cyanotic with palliated CHD                           | 94% | 87%                |
| F | 1.9 | AV discordance, double outlet RV with subpulmonary perimembranous outlet VSD; PDA                                                                 | PDA ligation                                                                                                                                                                                     | Cyanotic with palliated CHD                           | 92% | 79%                |
| M | 1.5 | Pulmonary atresia with VSD; MAPCAs; aortic                                                                                                        | Unifocalisation of MAPCAs; RV-PA                                                                                                                                                                 | Cyanotic with palliated CHD                           | 92% | 75%<br><i>FAIL</i> |

|   |      |                                                                                                                                                                 |                                                                                                                                                                                                                                   |                             |     |     |
|---|------|-----------------------------------------------------------------------------------------------------------------------------------------------------------------|-----------------------------------------------------------------------------------------------------------------------------------------------------------------------------------------------------------------------------------|-----------------------------|-----|-----|
|   |      | valve stenosis; 22q11 deletion                                                                                                                                  | conduit; aortic valvotomy; augmentation of PA bifurcation                                                                                                                                                                         |                             |     |     |
| F | 9.3  | Critical pulmonary stenosis; secundum ASD; long segment right PA hypoplasia/stenosis; severe pulmonary regurgitation                                            | Balloon dilation of pulmonary valve; right MBT shunt                                                                                                                                                                              | Cyanotic with palliated CHD | 91% | 85% |
| M | 1.2  | Double outlet RV with subaortic VSD; mid-muscular VSD                                                                                                           | PA banding with PDA ligation                                                                                                                                                                                                      | Cyanotic with palliated CHD | 89% | 79% |
| F | 10.7 | Double inlet indeterminate ventricle; pulmonary atresia; bilateral SVCs                                                                                         | Bilateral bidirectional cavopulmonary anastomosis                                                                                                                                                                                 | Cyanotic with palliated CHD | 88% | 82% |
| F | 5.9  | Double outlet RV; valvar & subvalvar pulmonary stenosis; non-committed VSD; ASD; MAPCAs                                                                         | Right MBT shunt; bilateral bidirectional cavopulmonary anastomosis with right PA enlargement, ligation of pulmonary trunk & division of MBT shunt; angioplasty of right PA with atrial septectomy; epicardial pacemaker insertion | Cyanotic with palliated CHD | 88% | 82% |
| M | 2.5  | Tricuspid atresia with concordant VA connections                                                                                                                | Right MBT shunt; bilateral bidirectional cavopulmonary connection with right PA reconstruction & reimplantation of shunt                                                                                                          | Cyanotic with palliated CHD | 87% | 82% |
| M | 0.8  | Right atrial isomerism; unbalanced AVSD (dominant RV) with large ventricular & atrial components; double outlet RV; total anomalous pulmonary venous connection | Repair of total anomalous pulmonary venous connection & PA banding; tightening of PA band & bilateral bidirectional cavopulmonary anastomosis                                                                                     | Cyanotic with palliated CHD | 87% | 83% |
| M | 2.0  | Absent left AV connection; concordant VA connections; secundum ASD; perimembranous VSD; mid-muscular VSD; coarctation of aorta                                  | Coarctation repair & PA banding; bidirectional cavopulmonary connection with aortopulmonary anastomosis (DKS), PA augmentation, atrial septectomy; transcatheter embolisation of aortopulmonary collateral                        | Cyanotic with palliated CHD | 86% | 76% |
| M | 2.7  | Situs solitus; double inlet RV; criss-cross AV connection; pulmonary atresia; ASD; left PA origin stenosis; RV dysfunction                                      | Right MBT shunt & PDA ligation; left PA augmentation; bidirectional cavopulmonary anastomosis, BT shunt take down & atrial septectomy                                                                                             | Cyanotic with palliated CHD | 84% | 79% |

|   |     |                                                                                                                                                                                     |                                                                                                                                                                                                                        |                             |     |     |
|---|-----|-------------------------------------------------------------------------------------------------------------------------------------------------------------------------------------|------------------------------------------------------------------------------------------------------------------------------------------------------------------------------------------------------------------------|-----------------------------|-----|-----|
| F | 4.2 | Hypoplastic left heart syndrome                                                                                                                                                     | Norwood procedure; revision of RV to PA conduit; revision of RV to PA conduit & reconstruction of PA bifurcation; balloon angioplasty of both PAs; classical Glenn with disconnection PAs & RV to Sano left PA conduit | Cyanotic with palliated CHD | 84% | 75% |
| F | 1.8 | Pulmonary atresia with VSD & MAPCAs; confluent hypoplastic branch PAs; 22q11 deletion                                                                                               | Central shunt from left brachiocephalic artery to pulmonary trunk                                                                                                                                                      | Cyanotic with palliated CHD | 83% | 77% |
| F | 2.7 | Left atrial isomerism; biventricular AV connection; interrupted IVC with azygous continuation to right SVC; hepatic veins drain to right sided LA; pulmonary veins to left sided LA | Left PA balloon dilation                                                                                                                                                                                               | Cyanotic with palliated CHD | 83% | 73% |
| F | 1.0 | Double inlet LV, discordant VA connection; right sided rudimentary RV; non-restrictive VSD; pulmonary stenosis                                                                      | Balloon atrial septostomy; bidirectional cavopulmonary anastomosis, atrial septectomy & closure of pulmonary trunk                                                                                                     | Cyanotic with palliated CHD | 83% | 71% |
| F | 2.7 | Tricuspid atresia with concordant VA connections; pulmonary stenosis                                                                                                                | Right MBT shunt; bidirectional cavopulmonary anastomosis, take down of MBT shunt, atrial septectomy                                                                                                                    | Cyanotic with palliated CHD | 82% | 73% |
| M | 1.4 | Transposition of great arteries with subvalvar & valvar pulmonary stenosis & subpulmonary VSD                                                                                       | Left MBT shunt & PDA ligation; urgent right MBT shunt                                                                                                                                                                  | Cyanotic with palliated CHD | 82% | 76% |
| M | 1.2 | Pulmonary atresia; VSD                                                                                                                                                              | Left MBT shunt; right MBT shunt                                                                                                                                                                                        | Cyanotic with palliated CHD | 82% | 75% |
| M | 2.5 | Tetralogy of Fallot with pulmonary atresia; MAPCAs; hypoplastic confluent PAs                                                                                                       | Right MBT shunt; RV-PA conduit & occlusion MBT shunt; right PA device occlusion of right MAPCA                                                                                                                         | Cyanotic with palliated CHD | 82% | 75% |
| M | 1.5 | Tetralogy of Fallot with pulmonary atresia; possible Mowat Wilson syndrome                                                                                                          | Neonatal right MBT shunt; left MBT shunt                                                                                                                                                                               | Cyanotic with palliated CHD | 80% | 74% |
| F | 0.9 | Pulmonary atresia with VSD & MAPCAs; hypoplasia of left PA                                                                                                                          | Left MBT shunt, unifocalisation of lung blood supply                                                                                                                                                                   | Cyanotic with palliated CHD | 80% | 72% |

|   |     |                                                                                                                                                                                                                                                                                                                            |                                                                                                     |                              |     |                    |
|---|-----|----------------------------------------------------------------------------------------------------------------------------------------------------------------------------------------------------------------------------------------------------------------------------------------------------------------------------|-----------------------------------------------------------------------------------------------------|------------------------------|-----|--------------------|
| M | 0.9 | Pulmonary atresia with intact ventricular septum; coronary fistula                                                                                                                                                                                                                                                         | Right MBT shunt; bidirectional cavopulmonary anastomosis & atrial septectomy & closure of MBT shunt | Cyanotic with palliated CHD  | 79% | 74%                |
| M | 1.2 | Tricuspid atresia with concordant VA connections                                                                                                                                                                                                                                                                           | Atrial septectomy & bidirectional cavopulmonary anastomosis                                         | Cyanotic with palliated CHD  | 78% | 69%<br><i>FAIL</i> |
| F | 3.0 | Transposition of great arteries with VSD & pulmonary stenosis                                                                                                                                                                                                                                                              | Right MBT shunt; left MBT shunt                                                                     | Cyanotic with palliated CHD  | 76% | 73%                |
| M | 0.3 | Ebstein malformation of the tricuspid valve; ASD                                                                                                                                                                                                                                                                           | None                                                                                                | Cyanotic with unrepaired CHD | 96% | 88%                |
| M | 0.4 | Severe Ebstein malformation of the tricuspid valve                                                                                                                                                                                                                                                                         | None                                                                                                | Cyanotic with unrepaired CHD | 96% | 90%                |
| M | 3.1 | Ebstein malformation of the tricuspid valve                                                                                                                                                                                                                                                                                | None                                                                                                | Cyanotic with unrepaired CHD | 96% | 85%<br><i>FAIL</i> |
| M | 0.7 | Complete AVSD with Tetralogy of Fallot; Down syndrome                                                                                                                                                                                                                                                                      | None                                                                                                | Cyanotic with unrepaired CHD | 88% | 81%                |
| F | 6.4 | Ebstein malformation of tricuspid valve                                                                                                                                                                                                                                                                                    | None                                                                                                | Cyanotic with unrepaired CHD | 86% | 77%                |
| F | 4.0 | Ebstein malformation of tricuspid valve; large secundum ASD; right aortic arch with aberrant left subclavian artery (vascular ring substrate)                                                                                                                                                                              | None                                                                                                | Cyanotic with unrepaired CHD | 82% | 75%                |
| F | 0.9 | Left atrial isomerism; hepatic vein to left sided LA; concordant VA connections; dextrocardia; pulmonary veins to left sided LA, interrupted IVS with azygous continuation to left SVC to left sided LA; common atrium with AVSD; no ventricular component; moderate left AV regurgitation; pulmonary valvar stenosis; PDA | None                                                                                                | Cyanotic with unrepaired CHD | 81% | 66%<br><i>FAIL</i> |

**Abbreviations:** ASD: atrial septal defect; AV: atrioventricular; AVSD: atrioventricular septal defect; CHD: congenital heart disease; DKS: Damus-Kaye-Stansel procedure; HCR: hypoxic challenge test; IUGR: intrauterine growth restriction; IVC: inferior vena cava; LA: left atrium; LV: left ventricle; MAPCAs: multiple aortopulmonary collaterals; MBT: modified Blalock-Taussig; PA: pulmonary artery; PDA: patent ductus arteriosus; PFO: patent foramen ovale; R-L: right to left; RA: right atrium; RV: right ventricle; RV-PA: right ventricle to pulmonary artery; SpO<sub>2</sub>: arterial oxygen saturation measured by pulse oximetry; SVC: superior vena cava; VA: ventriculo-arterial; VSD: ventricular septal defect.

**Online supplement - Table 2**

Baseline data and Hypoxic Challenge Testing results for those who passed the test (n=60) vs those who failed the test (n=8). Results are expressed as medians (IQR) unless stated otherwise. Data refer to the total patient numbers for the two groups except where stated.

| <b>Median (IQR)</b>                          | <b>Passed test</b>         | <b>Failed test</b>        |          |
|----------------------------------------------|----------------------------|---------------------------|----------|
| No.                                          | 60                         | 8                         |          |
| Male n (%)                                   | 32 (53%)                   | 4 (50%)                   |          |
| Age (yrs)                                    | 2.0 (1.2-4.5)              | 1.3 (0.9-1.6)             | ns       |
| SpHb (g/dl)                                  | 12.3 (10.8-13.0)<br>n = 32 | 12.7 (11.9-13.9)<br>n = 8 | ns       |
| Baseline SpO <sub>2</sub> (%)                | 96 (86-99)                 | 91 (83-96)                | ns       |
| Lowest test SpO <sub>2</sub> (%)             | 88 (78-92)                 | 75 (69-78)                | p=0.001  |
| Absolute drop in SpO <sub>2</sub> (%)        | 7 (6-8)                    | 15 (13-16)                | p<0.0001 |
| Time to reach lowest SpO <sub>2</sub> (mins) | 7.0 (5.0-10.0)<br>n = 34   | 5.4 (5.1-5.9)<br>n = 7    | ns       |
| Baseline heart rate (bpm)                    | 118 (97-134)               | 133 (122-137)             | ns       |
| Test heart rate (bpm)                        | 118 (99-133)               | 133 (127-139)             | ns       |
| Change in heart rate (bpm)                   | 1 (-6 to +7)               | 5 (+3 to +10)             | ns       |
| Baseline PtcCO <sub>2</sub> (kPa)            | 4.3 (4.0-4.5)<br>n = 58    | 4.2 (3.7-4.8)<br>n = 8    | ns       |
| Test PtcCO <sub>2</sub> (kPa)                | 4.3 (3.9-4.6)<br>n = 57    | 4.4 (3.9-4.9)<br>n = 8    | ns       |
| Change in PtcCO <sub>2</sub> (kPa)           | 0 (-0.2 to +0.2)           | 0 (-0.4 to +0.2)          | ns       |
| Baseline QTc (ms)                            | 410 (394-426)<br>n = 53    | 406 (397-431)<br>n = 6    | ns       |
| Test QTc (ms)                                | 419 (404-426)<br>n = 53    | 422 (396-429)<br>n = 6    | ns       |
| Change in QTc (ms)                           | +2 (-4 to +21)<br>n = 53   | 0 (-3 to +16)<br>n = 6    | ns       |
